# Supplementary material for: Effects of the halogenido ligands on the Kumada-coupling catalytic activity of [Ni{tBuN(PPh2)2-κ2P}X2], X = Cl, Br, I, complexes
Source: Royal Society of Chemistry journal article supplement (doi:10.1039/d1ra04572e), 2022-01-01
Supplement: d1ra04572e2.pdf [file d1ra04572e2.pdf]

## SUPPORTING INFORMATION

### Effects of the halogenido ligands to Kumada-coupling catalytic activity of [Ni{*i*BuN(PPh<sub>2</sub>)<sub>2</sub>- $\kappa^2$ P}X<sub>2</sub>], X = Cl, Br, I, complexes

Polydoros-Chrysovalantis Ioannou,<sup>[a]</sup> Radek Coufal,<sup>[b,c]</sup> Kalliopi Kakridi,<sup>[a]</sup> Catherine P. Raptopoulou,<sup>[d]</sup> Olga Trhlíková,<sup>[e]</sup> Vassilis Psycharis,<sup>\*,[d]</sup> Jiří Zedník,<sup>\*,[c]</sup> Panayotis Kyritsis,<sup>\*,[a]</sup> Jiří Vohlídal<sup>[c]</sup>

- [a] Inorganic Chemistry Laboratory, Department of Chemistry, National and Kapodistrian University of Athens, Panepistimiopolis, Zografou, 15771 Athens, Greece
- [b] Technical University of Liberec, Faculty of Health Studies, Department of Science and Research, Studentska 1402/2, CZ-461 17, Liberec 1, Czech Republic, radek.coufal@tul.cz
- [c] Charles University, Faculty of Science, Department of Physical and Macromolecular Chemistry, Albertov 2030, CZ-128 43, Prague 2, Czech Republic
- [d] Institute of Nanoscience and Nanotechnology, N.C.S.R. "Demokritos", Aghia Paraskevi 15310, Attiki, Greece
- [e] Institute of Macromolecular Chemistry, v.v.i., Academy of Sciences of the Czech Republic, Heyrovský Sq. 2, 16206 Prague 6, Czech Republic

## IR spectra

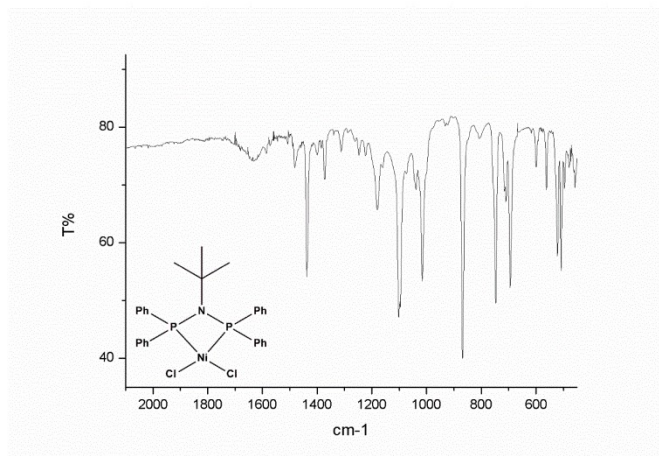

**Figure S1.** FT-IR spectrum of [Ni(P,P)Cl<sub>2</sub>]. Selected bands (KBr, cm<sup>-1</sup>): 1437  $\nu$ (P-Ph), 1180, 1101, 1015, 868  $\nu$ (P-N-P), 746, 694.

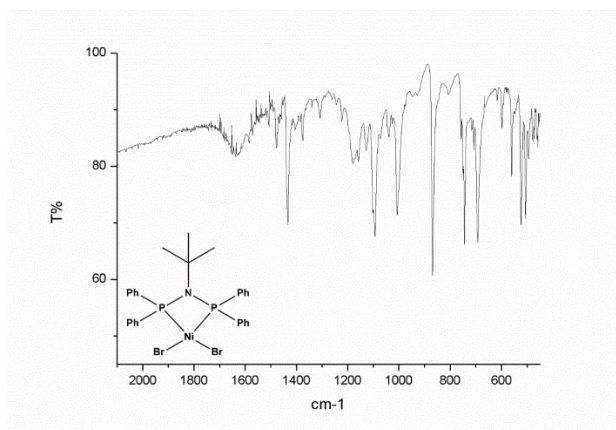

**Figure S2.** FT-IR spectrum of [Ni(P,P)Br<sub>2</sub>]. Selected bands (KBr, cm<sup>-1</sup>): 1477, 1433  $\nu$ (P-Ph), 1173, 1093, 1007, 868  $\nu$ (P-N-P), 744, 692.

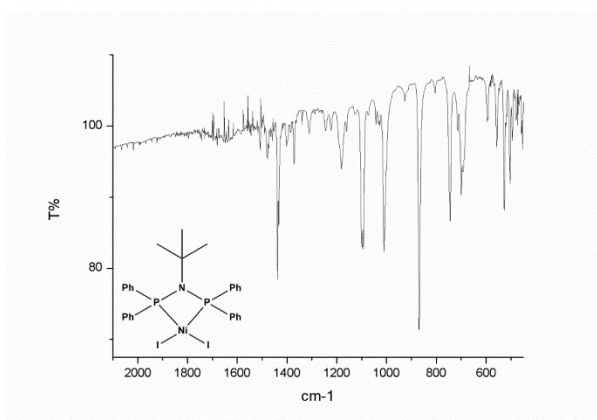

**Figure S3.** FT-IR spectrum of [Ni(P,P)I<sub>2</sub>]. Selected bands (KBr, cm<sup>-1</sup>): 1481, 1437  $\nu$ (P-Ph), 1370, 1180, 1098, 1009, 868  $\nu$ (P-N-P), 744, 700.

## $^1\text{H}$ and $^{13}\text{C}$ NMR spectra

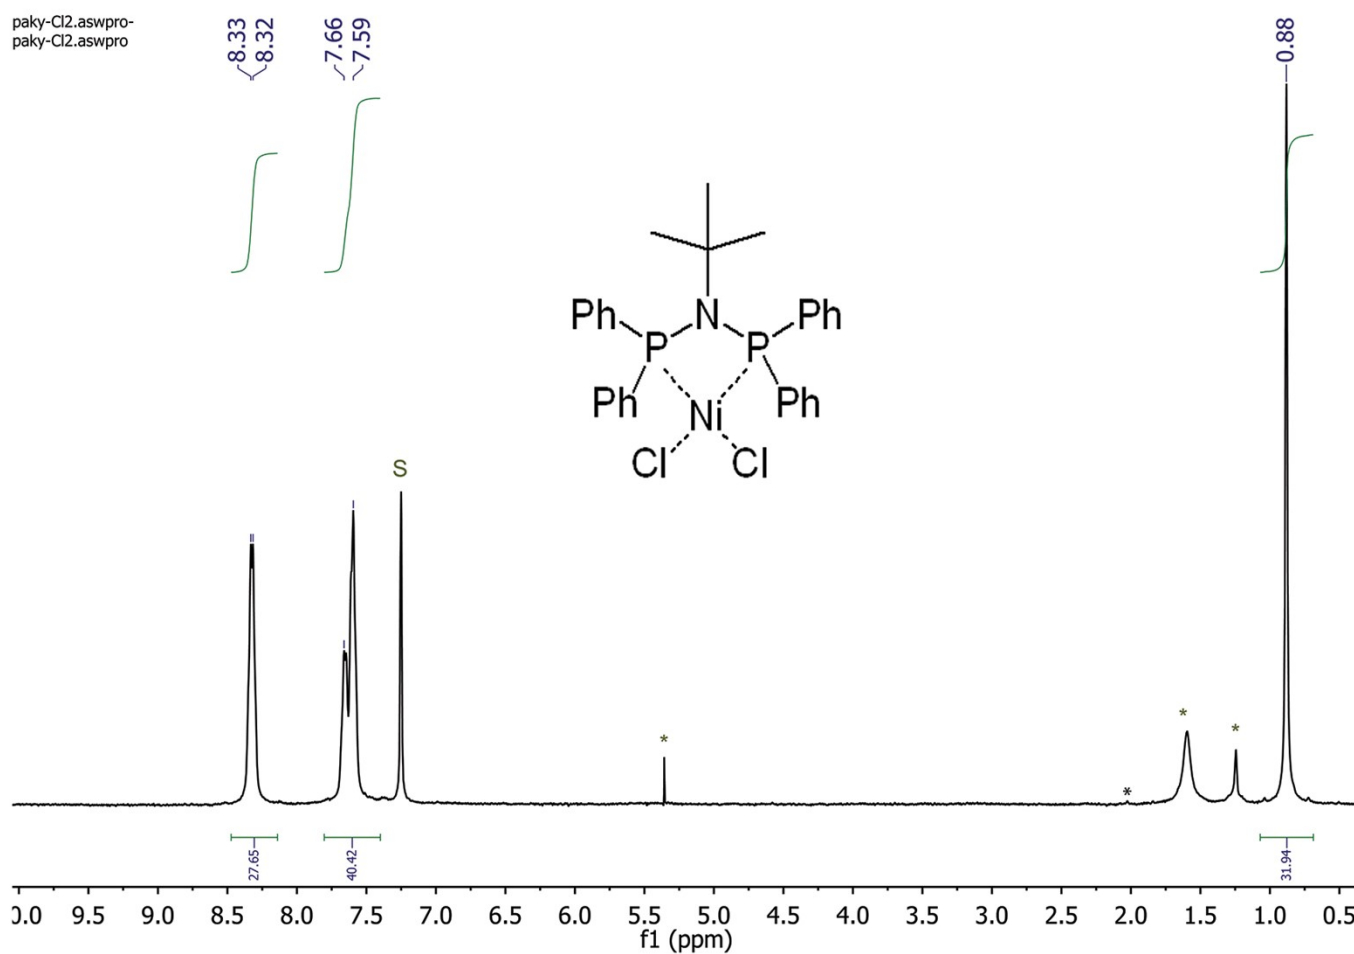

**Figure S4.**  $^1\text{H}$  NMR (400 MHz,  $\text{CDCl}_3$ ) spectrum of  $[\text{Ni}(\text{P},\text{P})\text{Cl}_2]$ . S – 7.25 ppm  $\text{CH}_3\text{Cl}$  (solvent signal), 5.27 ppm trace of dichloromethane, 2.10 ppm trace of acetone, 1.50 ppm trace of moisture, 1.25 ppm trace of hexane, all impurities are marked by an asterisk.

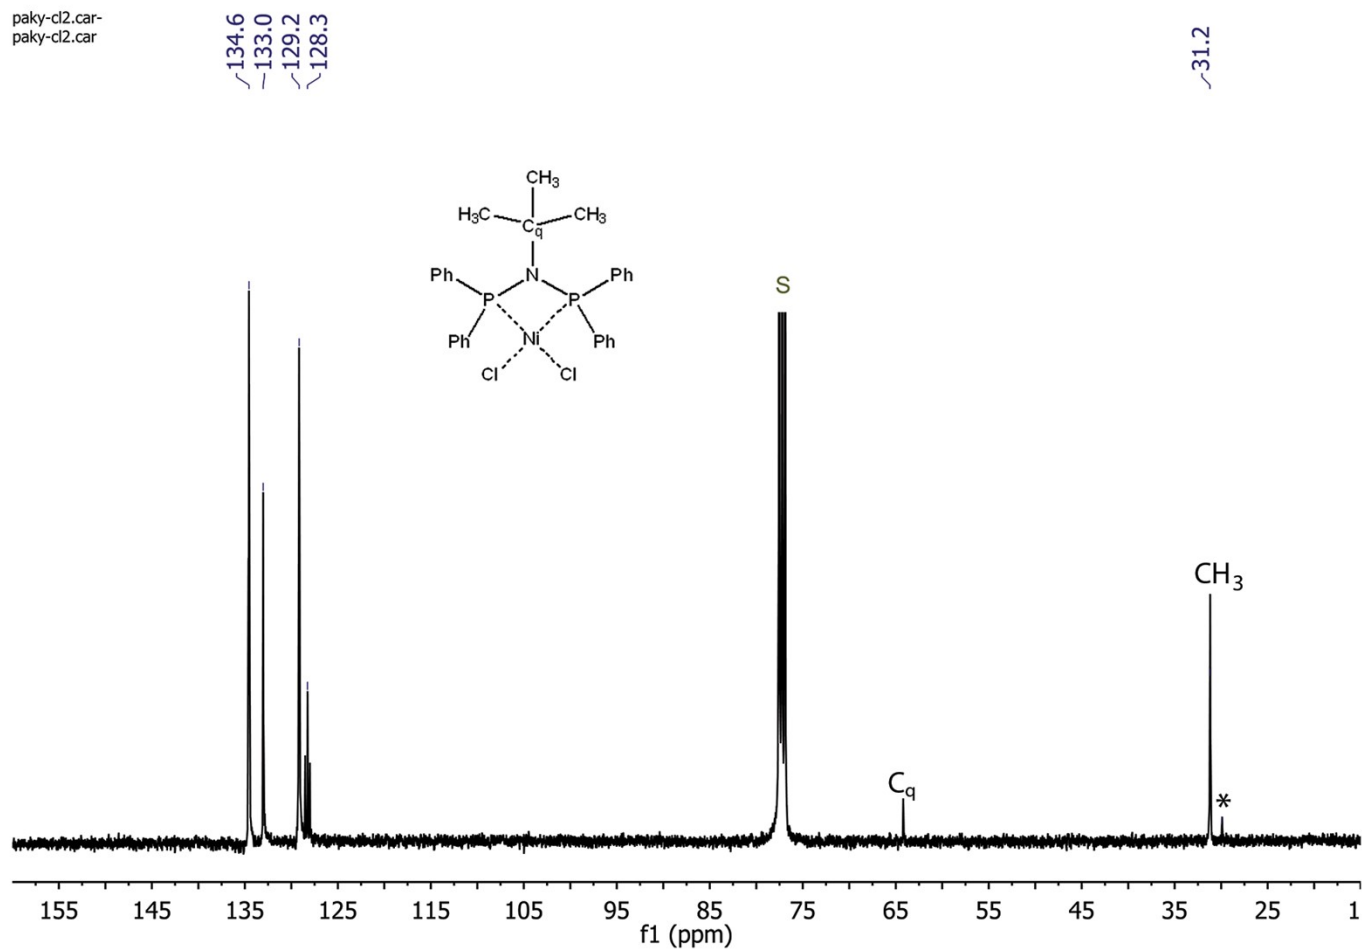

**Figure S5.**  $^{13}\text{C}$  NMR (101 MHz,  $\text{CDCl}_3$ ) spectrum of  $[\text{Ni}(\text{P,P})\text{Cl}_2]$ , S – solvent peak, residual trace of acetone is marked by an asterisk.

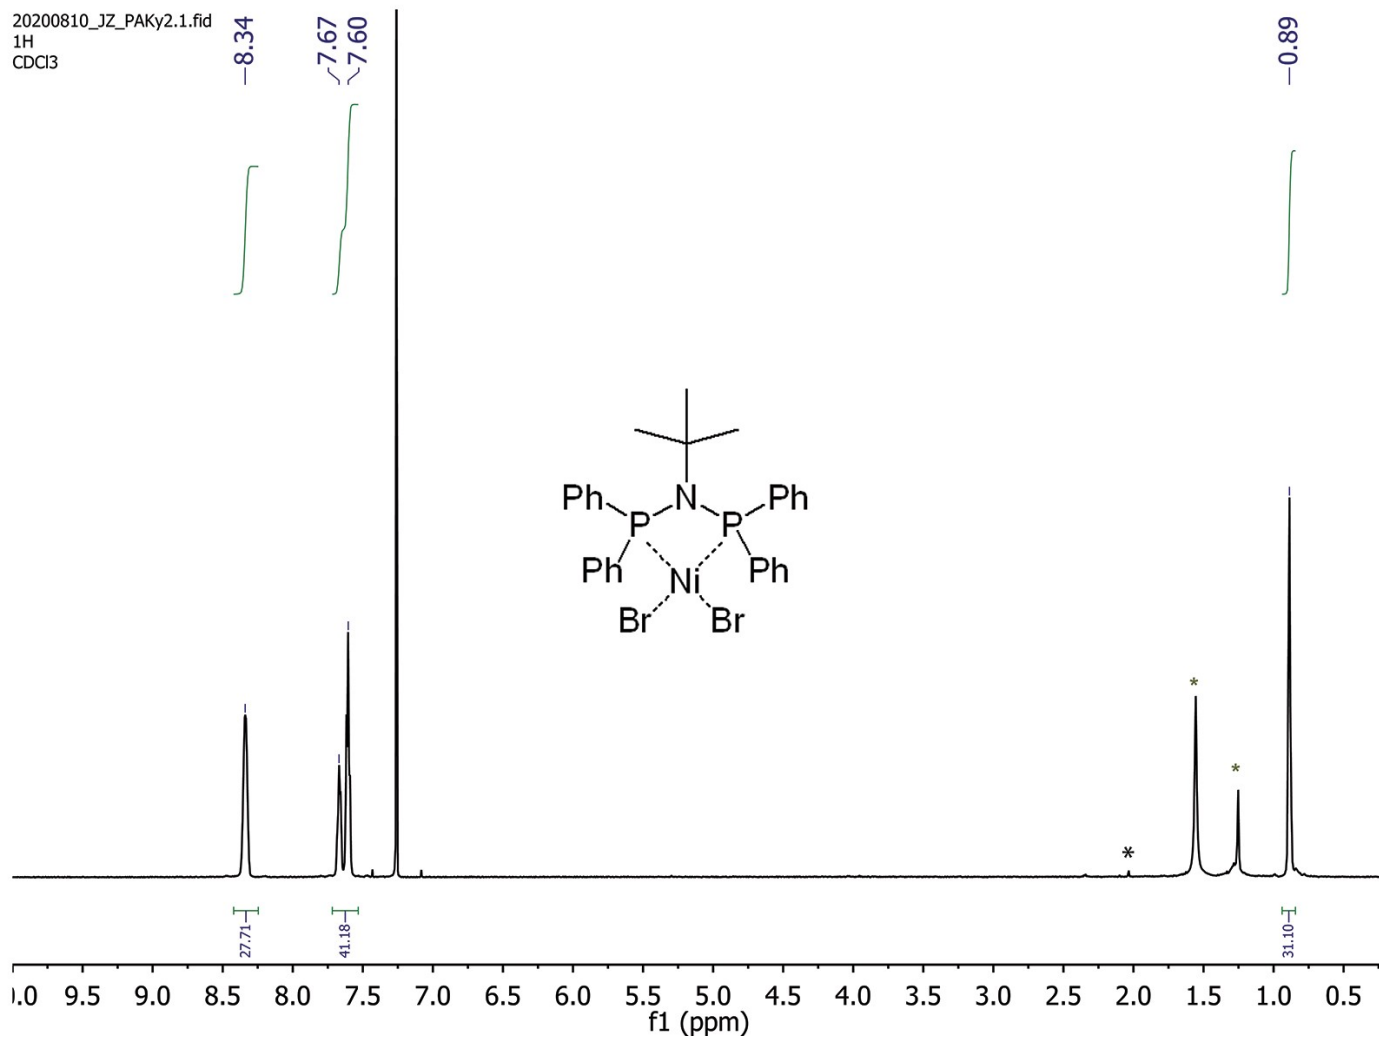

**Figure S6.** <sup>1</sup>H NMR (600 MHz, CDCl<sub>3</sub>) spectrum of [Ni(P,P)Br<sub>2</sub>]. S – 7.25 ppm CH<sub>3</sub>Cl (solvent signal), 2.1 ppm – acetone, 1.50 ppm trace of moisture, 1.25 ppm trace of hexane, all impurities are marked by an asterisk.

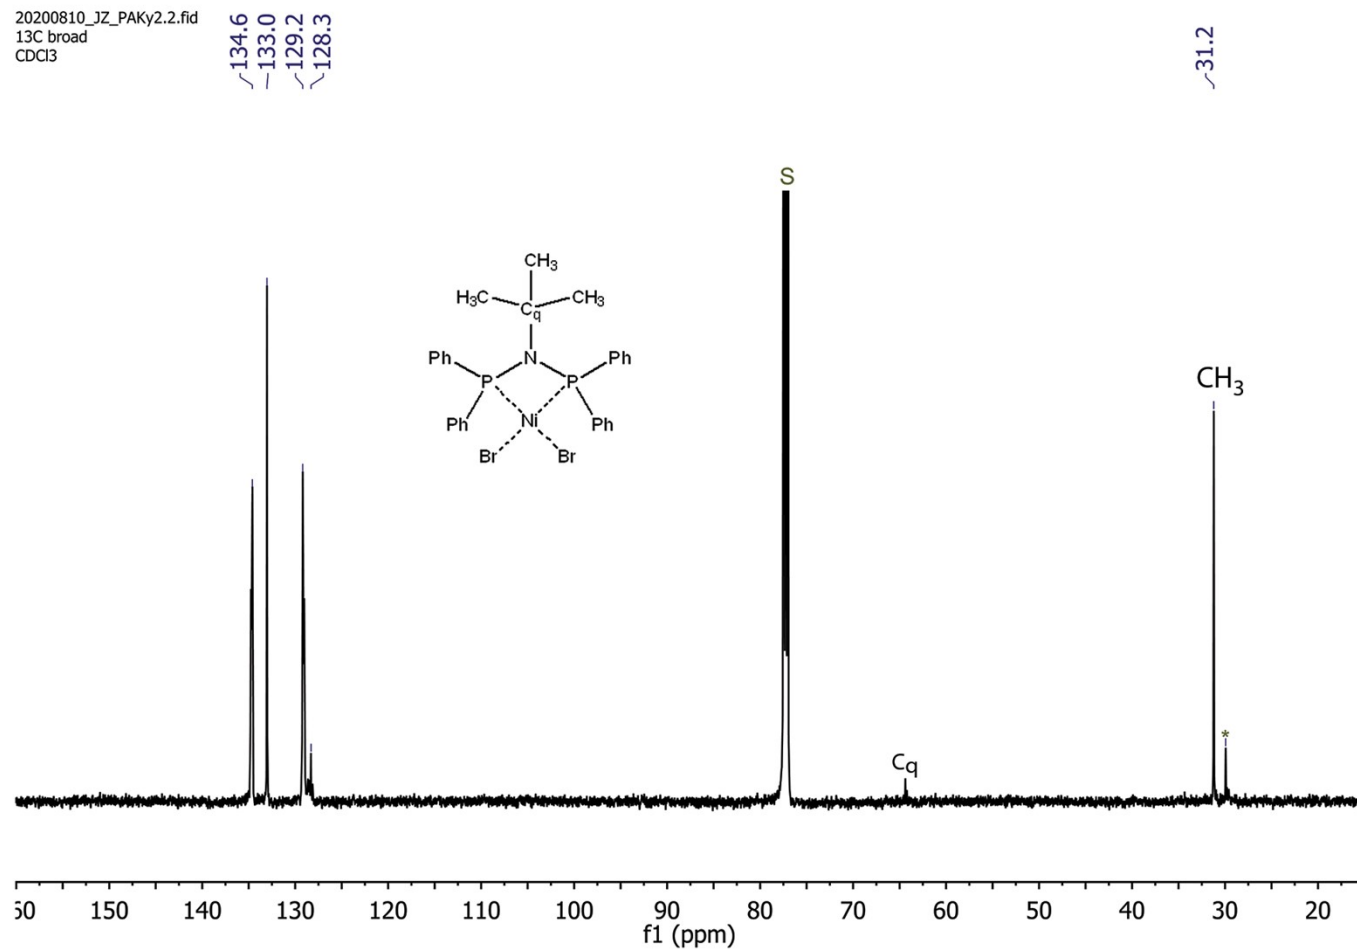

**Figure S7.** <sup>13</sup>C NMR (151 MHz, CDCl<sub>3</sub>) spectrum of  $[\text{Ni}(\text{P,P})\text{Br}_2]$ . S – solvent peak, residual trace of acetone (29.9 ppm) is marked by an asterisk.

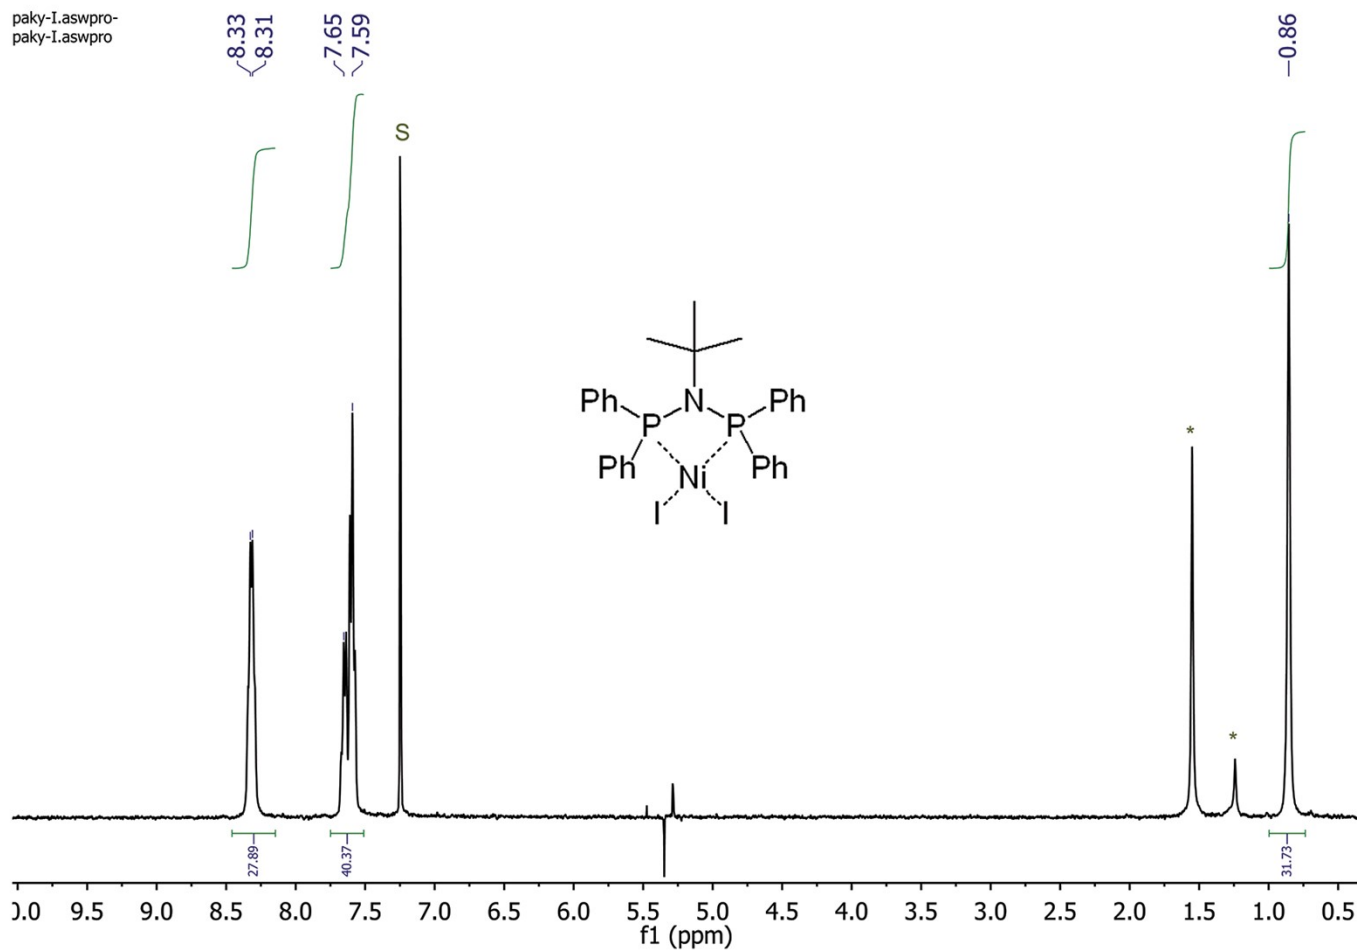

**Figure S8.**  $^1\text{H}$  NMR (400 MHz,  $\text{CDCl}_3$ ) spectrum of  $[\text{Ni}(\text{P},\text{P})\text{I}_2]$ . S – 7.25 ppm  $\text{CH}_3\text{Cl}$  (solvent signal), 1.50 ppm moisture, 1.25 ppm trace of hexane, all impurities are marked by an asterisk.

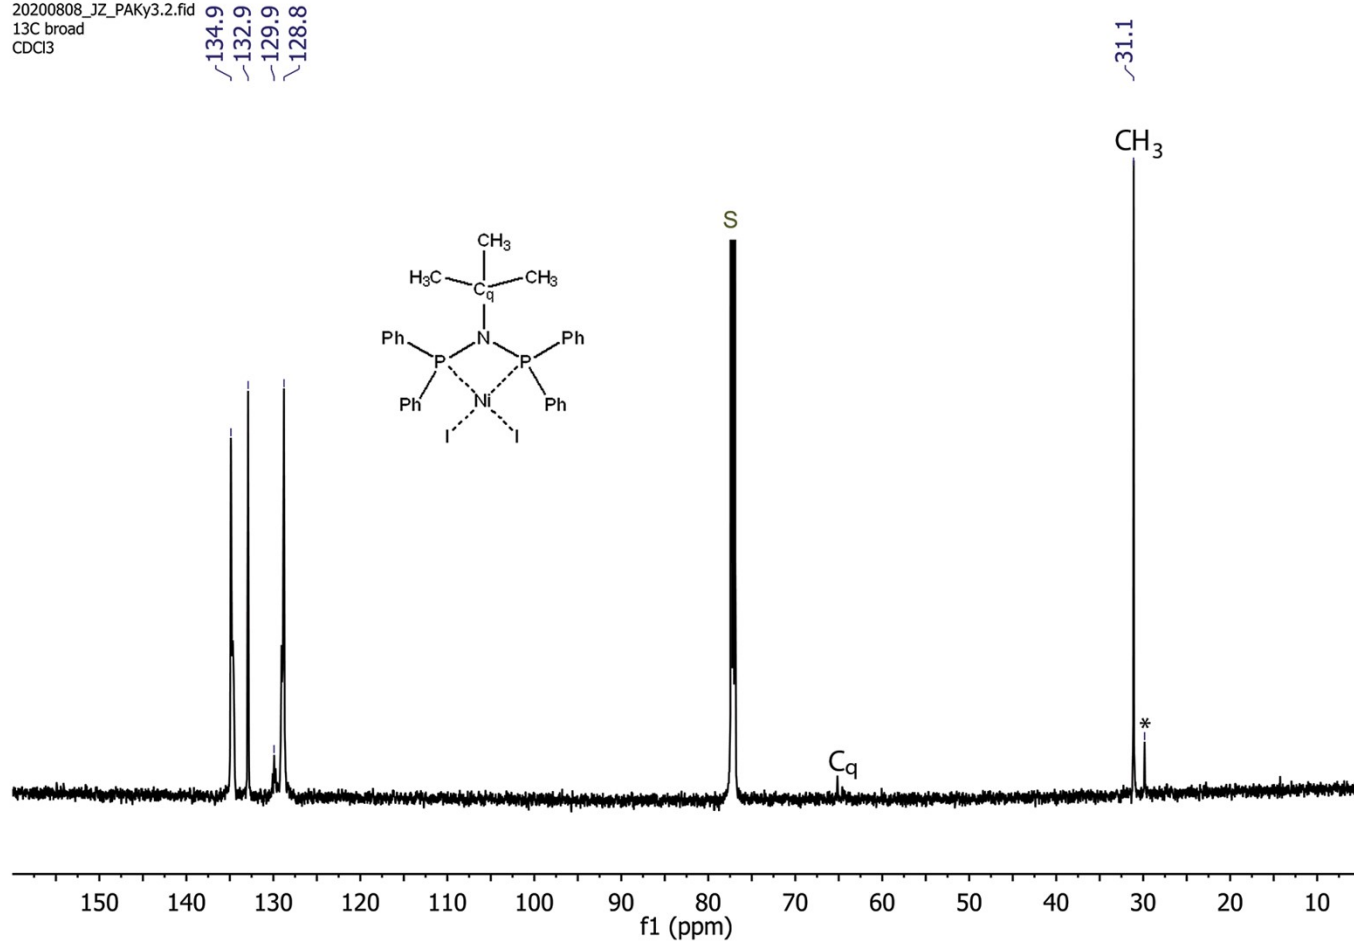

**Figure S9.**  $^{13}\text{C}$  NMR (151 MHz,  $\text{CDCl}_3$ ) spectrum of  $[\text{Ni}(\text{P,P})\text{I}_2]$ , S – solvent peak, trace of acetone (29.9 ppm) is marked by an asterisk.

# $^{31}\text{P}$ NMR spectra

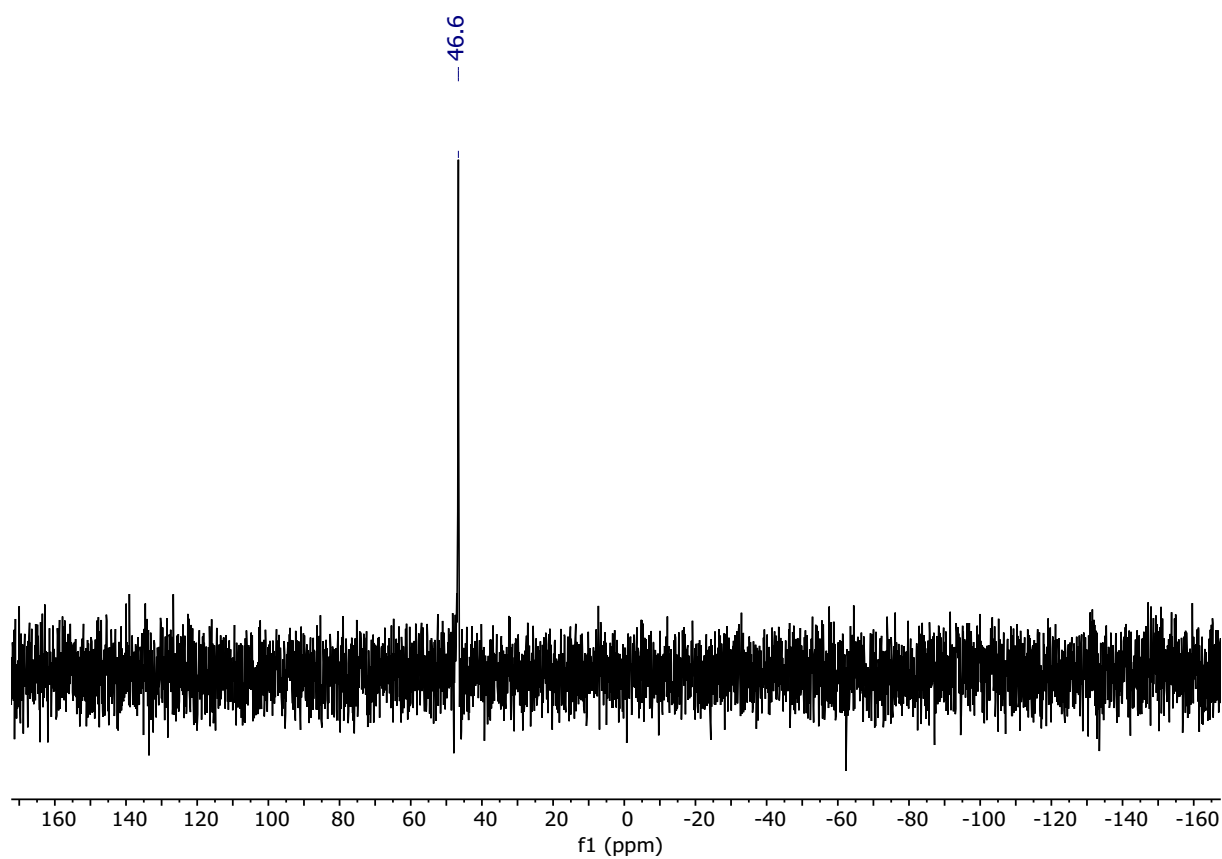

**Figure S10.**  $^{31}\text{P}$  NMR (162 MHz,  $\text{CDCl}_3$ ) spectrum of  $[\text{Ni}(\text{P,P})\text{Cl}_2]$ . The spectral window was extended to the full scale.

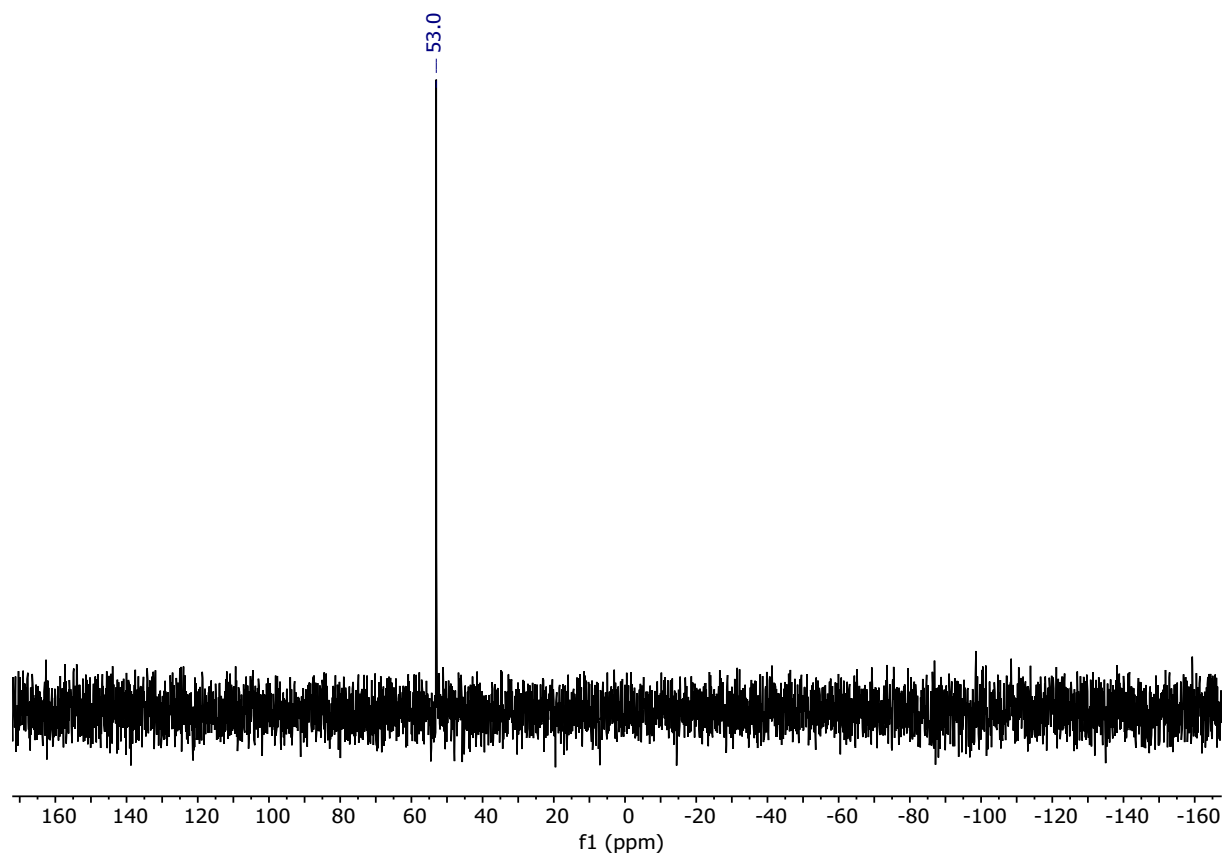

**Figure S11.**  $^{31}\text{P}$  NMR (162 MHz,  $\text{CDCl}_3$ ) spectrum of  $[\text{Ni}(\text{P},\text{P})\text{Br}_2]$ . The spectral window was extended to the full scale.

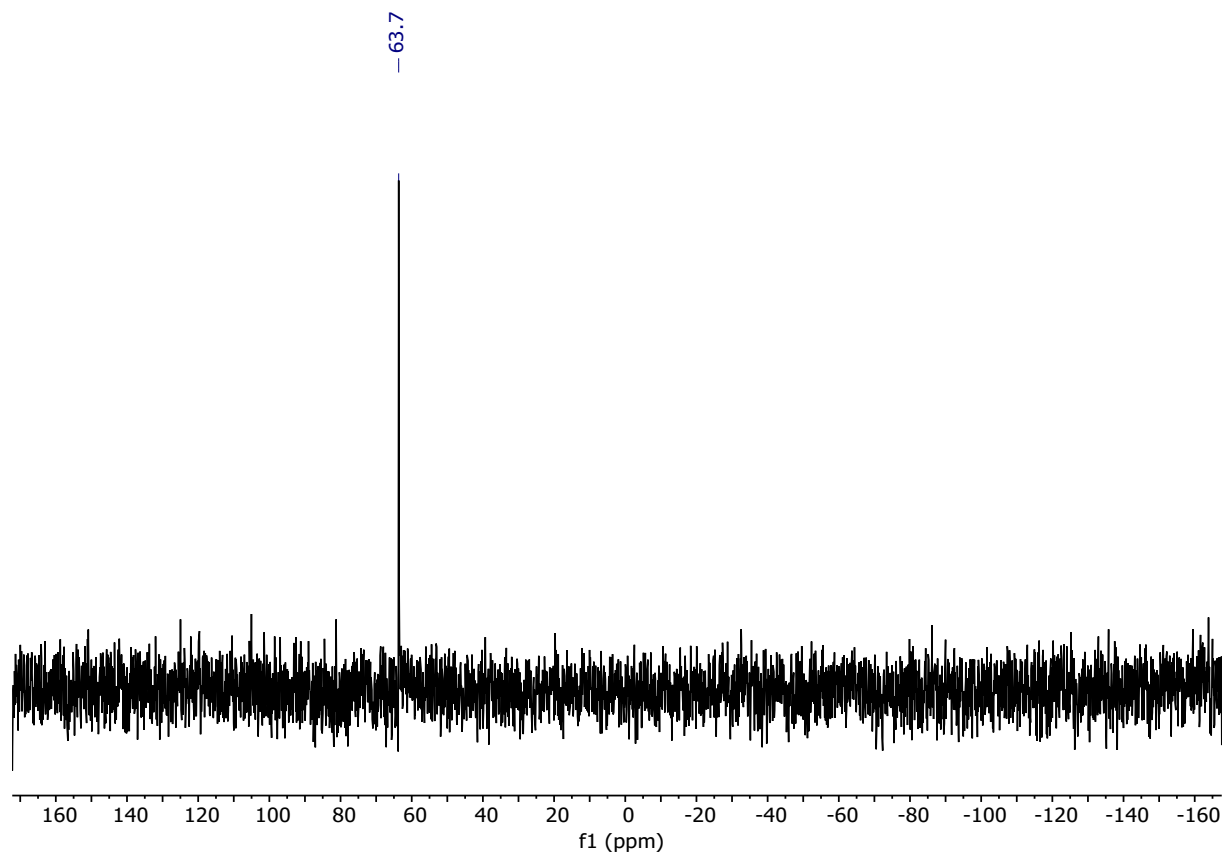

**Figure S12.**  $^{31}\text{P}$  NMR (162 MHz,  $\text{CDCl}_3$ ) spectrum of  $[\text{Ni}(\text{P},\text{P})\text{I}_2]$ . The spectral window was extended to the full scale.

## X-ray crystallography

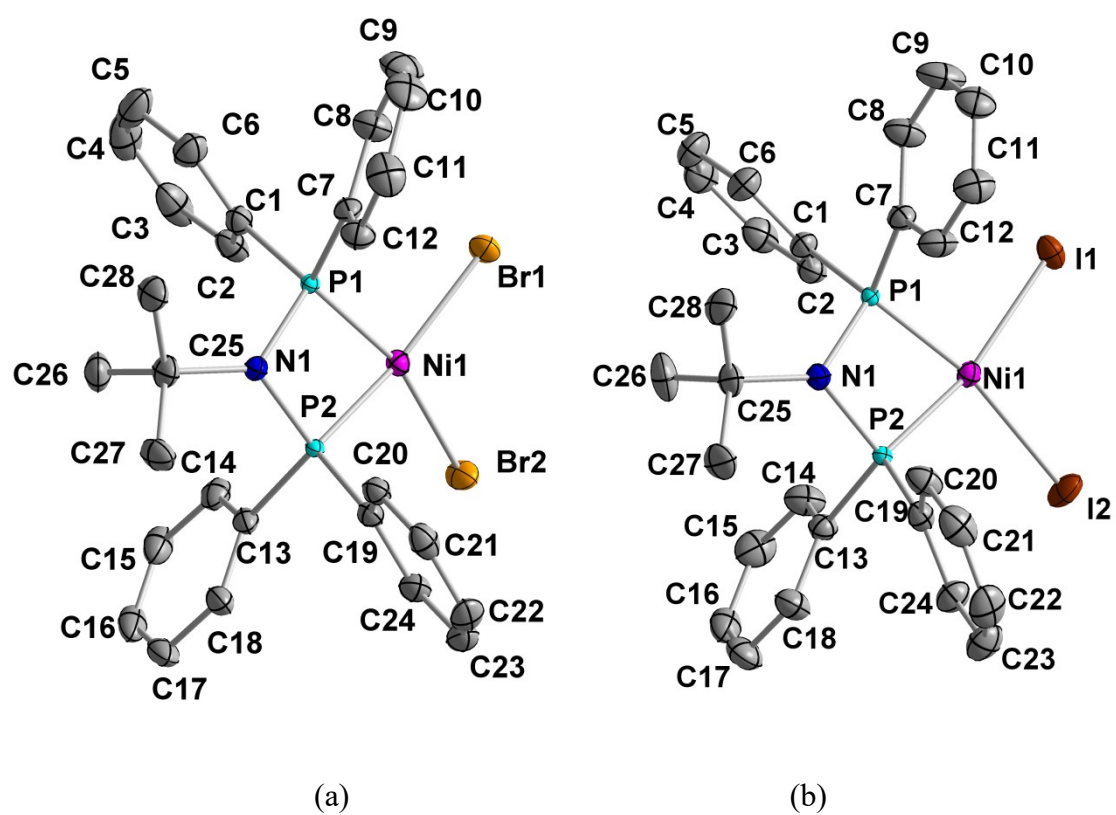

**Figure S13.** Molecular structures and atom numbering of  $[\text{Ni}(\text{P},\text{P})\text{X}_2]$ ,  $\text{X} = \text{Br}, \text{I}$ : (a) and (b), respectively. Thermal ellipsoids are presented at a level 50 % probability. Hydrogen atoms are omitted for clarity.

## MS spectra

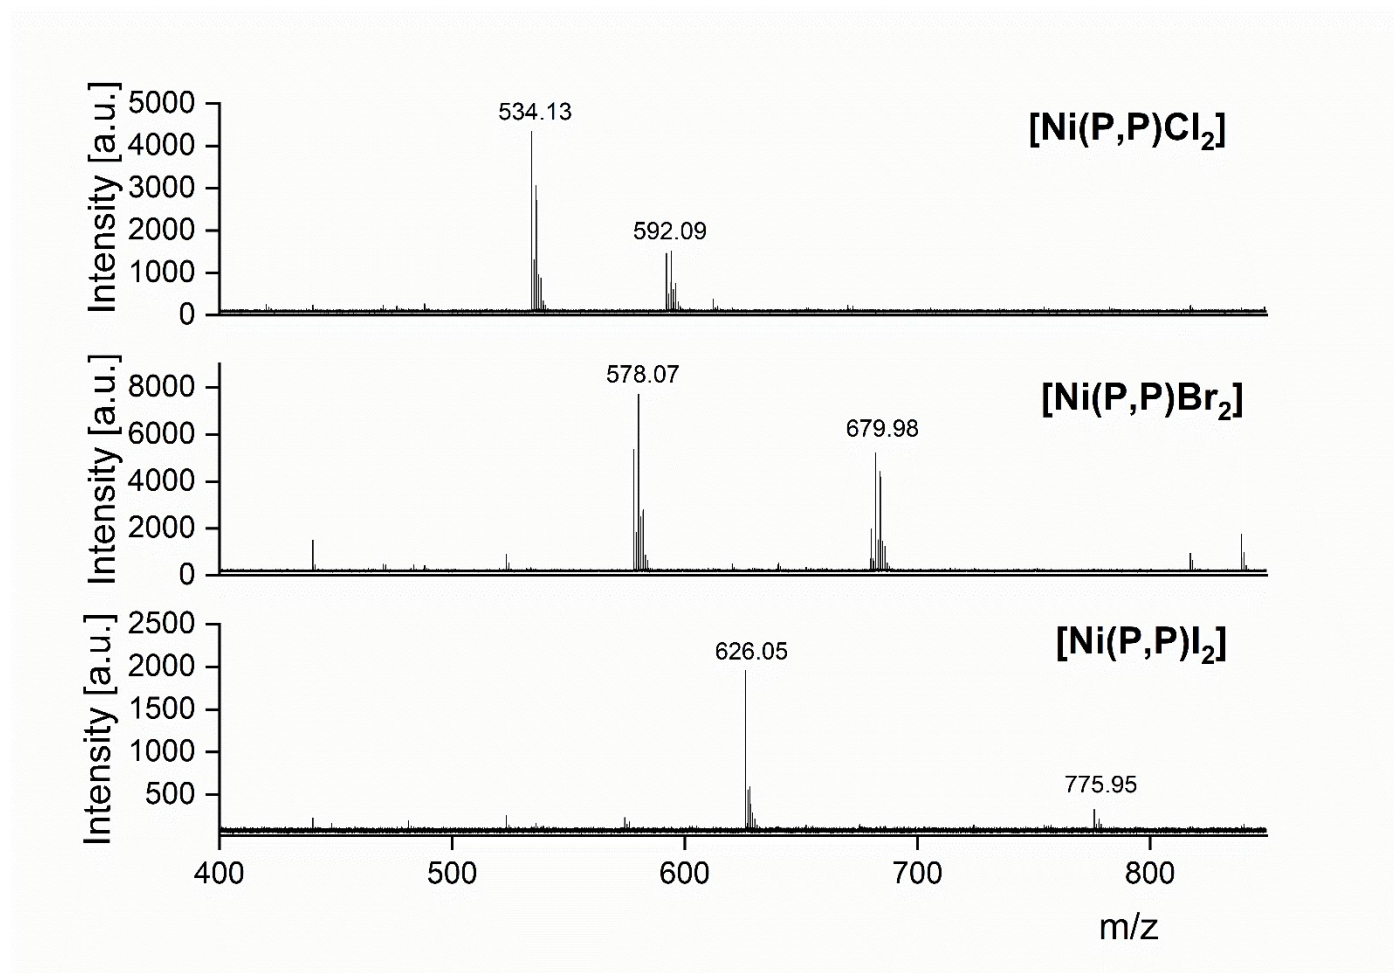

**Figure S14.** LDI-MS spectra of  $[\text{Ni}(\text{P},\text{P})\text{X}_2]$ .

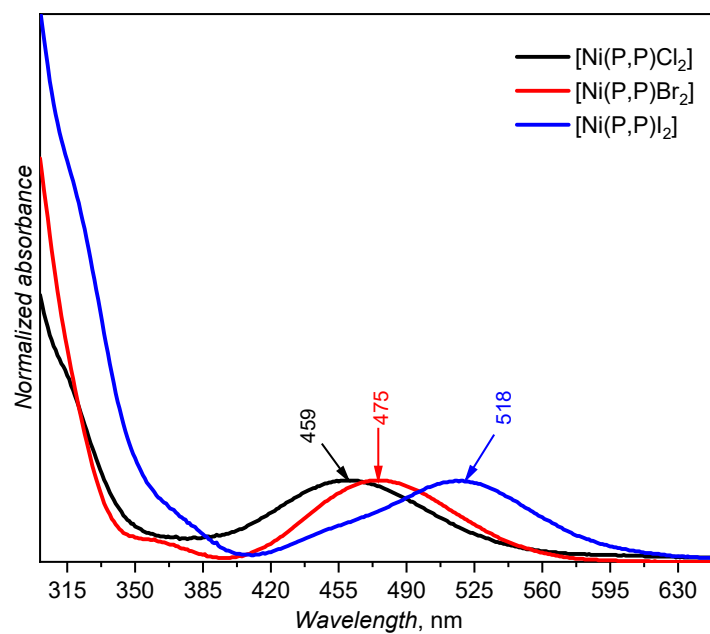

**Figure S15.** UV-vis spectra of complexes  $[\text{Ni}(\text{P},\text{P})\text{X}_2]$ ,  $\text{X} = \text{Cl}$  (1),  $\text{Br}$  (2),  $\text{I}$  (3), in THF solution ( $\sim 10^{-5}$  M)

**Table S1.** Data for reactions of **4-<sup>t</sup>Bu** substrate with Grignard reagent **T** catalyzed by complexes **[Ni(P,P)X<sub>2</sub>]**.  $Y_{\text{CROSS}}$  and  $Y_{\text{HOMO}}$  stand for the substrate conversion by cross-coupling and homo-coupling, respectively (Scheme 2).

| [Ni(P,P)X <sub>2</sub> ]<br>Catalyst |                   | X = Cl                         |                               | X = Br                         |                               | X = I                          |                               |
|--------------------------------------|-------------------|--------------------------------|-------------------------------|--------------------------------|-------------------------------|--------------------------------|-------------------------------|
| Reaction                             | <i>t</i> ,<br>min | <i>Y</i> <sub>CROSS</sub><br>% | <i>Y</i> <sub>HOMO</sub><br>% | <i>Y</i> <sub>CROSS</sub><br>% | <i>Y</i> <sub>HOMO</sub><br>% | <i>Y</i> <sub>CROSS</sub><br>% | <i>Y</i> <sub>HOMO</sub><br>% |
| 4- <sup>t</sup> Bu + T               | 20                | 76                             | < 2                           | 1.0                            | < 2                           | 1                              | < 2                           |
|                                      | 90                | 85                             | < 2                           | 51                             | < 2                           | 22                             | < 2                           |
|                                      | 1080              | 90                             | < 2                           | 61                             | < 2                           | 65                             | < 2                           |

**Table S2.** Data for Kumada coupling reactions between substrates with shielded iodine atom and Grignard reagent **T** catalyzed by **[Ni(P,P)Cl<sub>2</sub>]**.  $Y_{\text{CROSS}}$  and  $Y_{\text{HOMO}}$  stand for the substrate conversion by cross-coupling and homo-coupling, respectively (Scheme 2).

| Catalyst                       | Substrate | $t$ ,<br>min | <b>4-<sup>t</sup>Bu</b> |                        | <b>2-Me</b>             |                        | <b>2,6-diMe</b>         |                        |
|--------------------------------|-----------|--------------|-------------------------|------------------------|-------------------------|------------------------|-------------------------|------------------------|
|                                |           |              | $Y_{\text{CROSS}}$<br>% | $Y_{\text{HOMO}}$<br>% | $Y_{\text{CROSS}}$<br>% | $Y_{\text{HOMO}}$<br>% | $Y_{\text{CROSS}}$<br>% | $Y_{\text{HOMO}}$<br>% |
| <b>[Ni(P,P)Cl<sub>2</sub>]</b> |           | 20           | 76                      | < 2                    | 20                      | 8                      | 57                      | 18                     |
|                                |           | 90           | 85                      | < 2                    | 73                      | 12                     | 58                      | 24                     |
|                                |           | 1080         | 90                      | < 2                    | 76                      | 15                     | 62                      | 26                     |

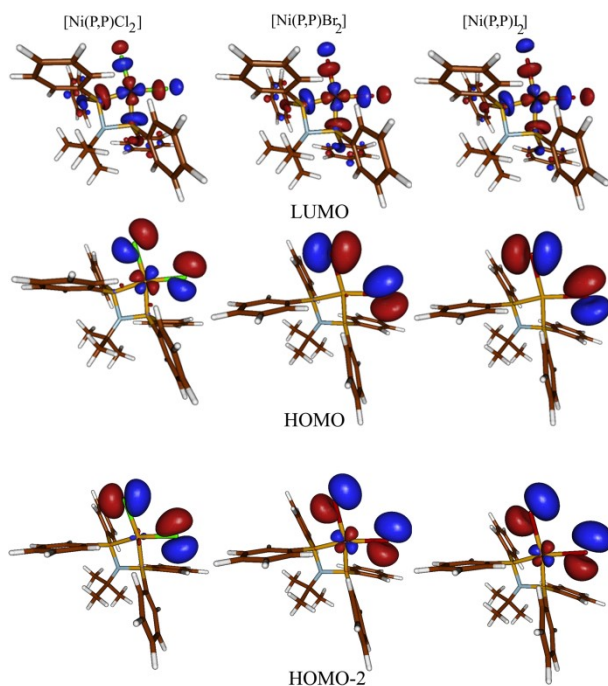

**Figure S16.** The DFT-calculated LUMO, HOMO and HOMO-2 orbitals of complexes **[Ni(P,P)X<sub>2</sub>]** showing contours at  $\pm 0.05$  a.u.

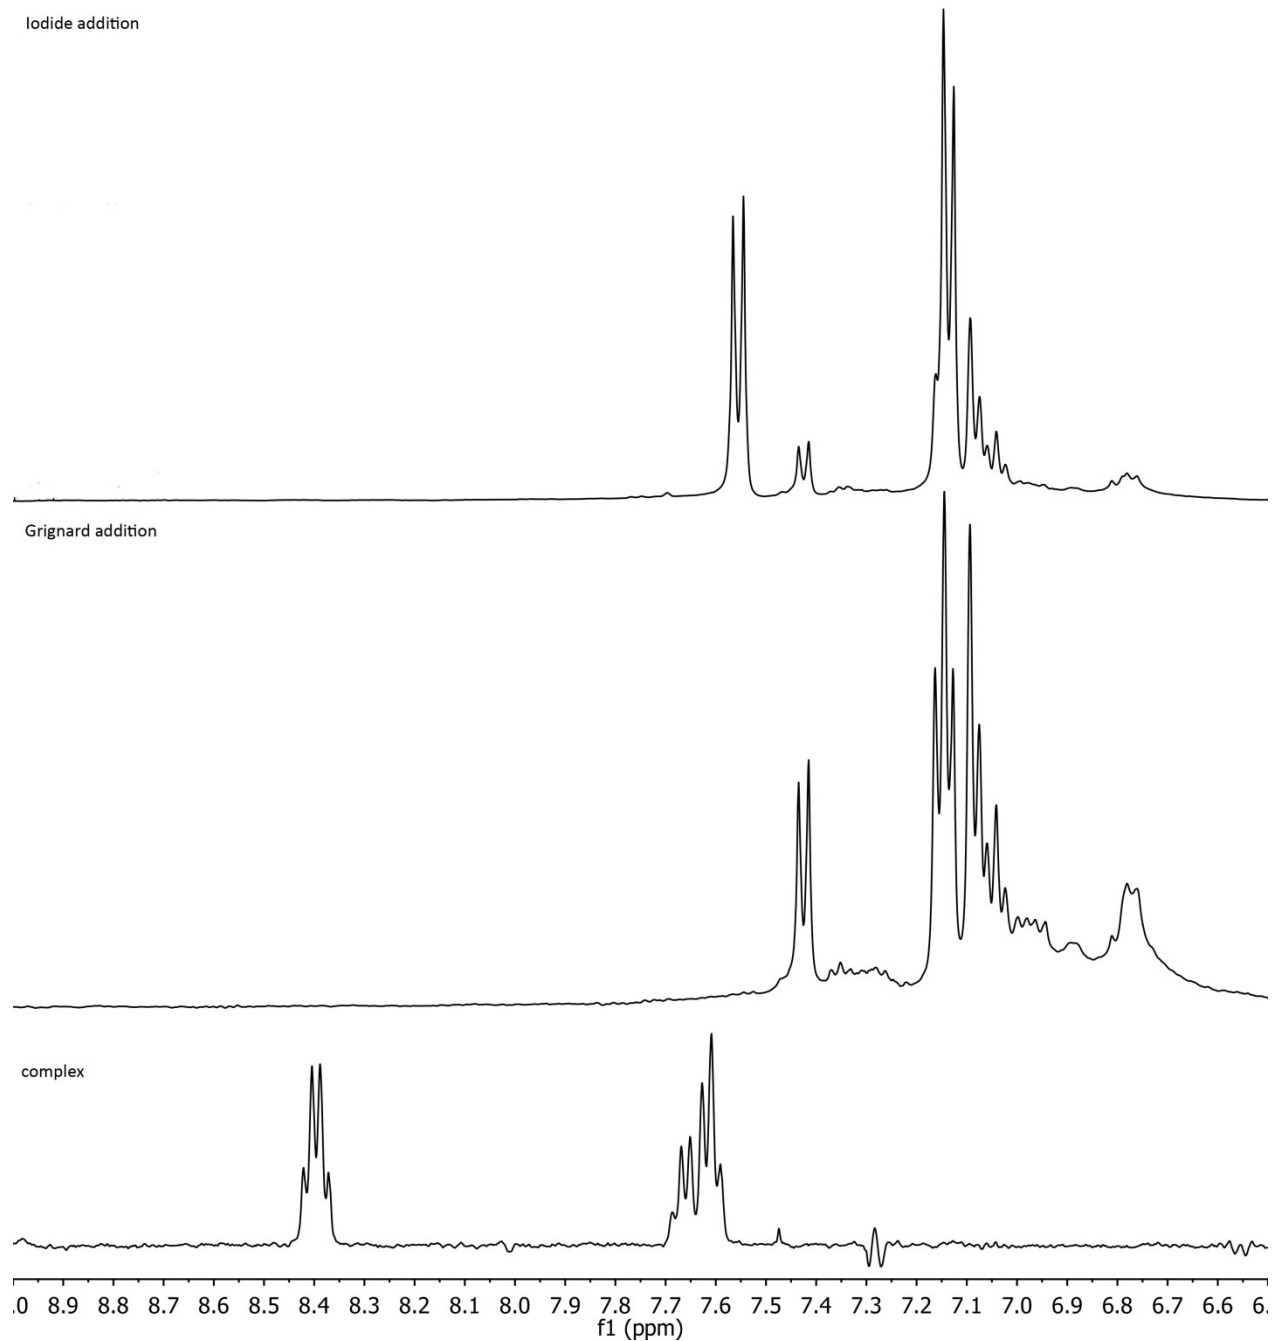

**Figure S17.**  $^1\text{H}$  NMR spectra upon addition of first **T** and then **4'-Bu** to a THF solution of  $[\text{Ni}(\text{P},\text{P})\text{Cl}_2]$ .

Reagent T - *p*-tolylMgBr  
4-tBu - 4-iodo-*t*-butylbenzene

[Ni(P,P)Cl<sub>2</sub>] + Reagent T + 4-tBu added 2nd

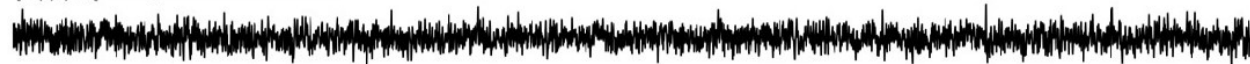

[Ni(P,P)Cl<sub>2</sub>] + Reagent T added 1st

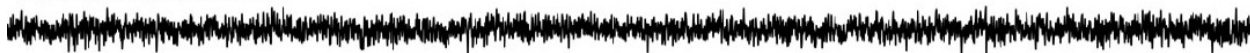

[Ni(P,P)Cl<sub>2</sub>]

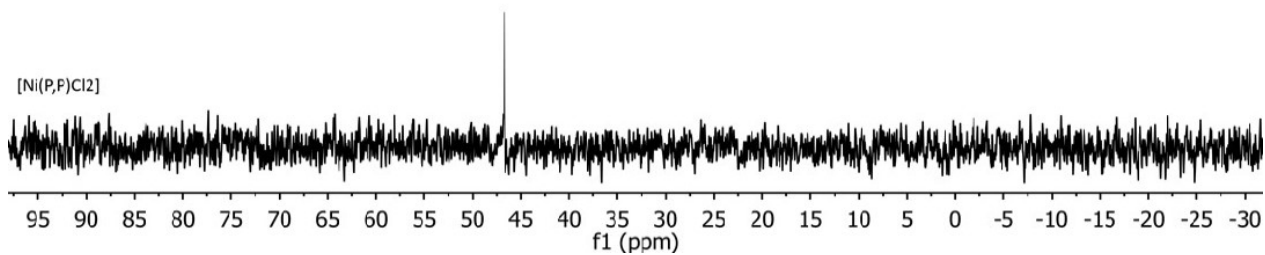

**Figure S18.** <sup>31</sup>P NMR spectra upon addition of first T and then 4-tBu to a THF solution of [Ni(P,P)Cl<sub>2</sub>].
